# Supplementary material
Source: PubMed Central journal article supplement (PMC6675896)

## **Structural Basis for Cooperative Binding of EBNA1 to the Epstein-Barr Virus Dyad Symmetry Minimal Origin of Replication**

Kimberly A. Malecka<sup>1</sup>, Jayaraju Dheekollu<sup>1</sup>, Julianna S. Deakyne<sup>1</sup>, Andreas Wiedmer<sup>1</sup>, Ursula D. Ramirez<sup>2</sup>, Paul M. Lieberman<sup>1\*</sup>, and Troy E. Messick<sup>1\*</sup>

### **Supplemental Figures and Tables Legends**

**Supplemental Figure 1. Biacore sensorgrams for all EBNA1 WT, mutants.** Left, representative sensorgrams for EBNA1 + biotinylated DS4 as indicated. Right, representative sensorgrams for EBNA1 + biotinylated DS34 as indicated.

**Supplemental Table 1. Root mean square deviations for all published EBNA1 dimers.**

RMSDs were calculated by PyMOL using the CA alpha alignment script.

# Supplemental Figure 1

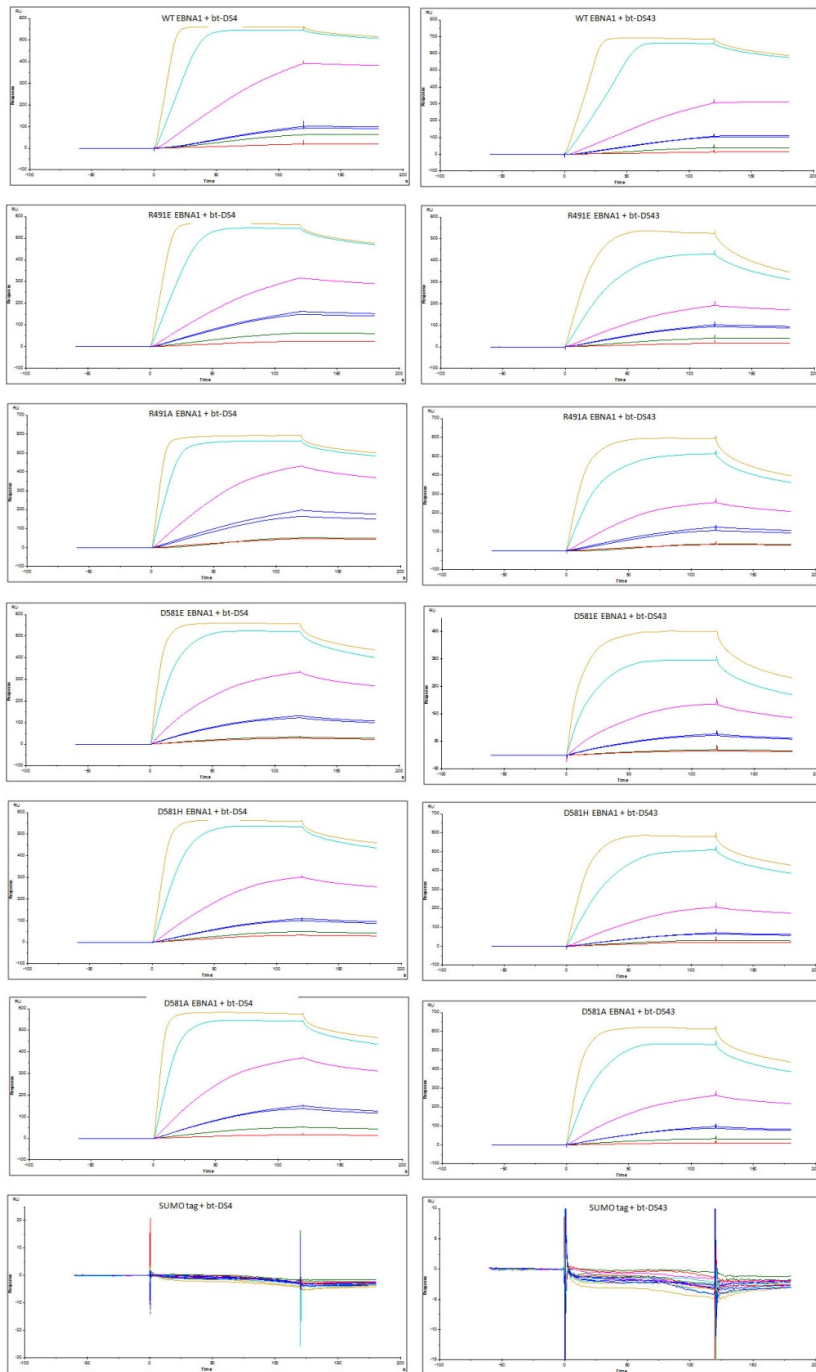

Supplement: JVI.00487-19-s0001.pdf [file JVI.00487-19-s0001.pdf]
